# Supplementary material for: Behavioural inference from signal processing using animal-borne multi-sensor loggers: a novel solution to extend the knowledge of sea turtle ecology
Source: PubMed Central journal article supplement (PMC7277266; doi:10.1098/rsos.200139), 2020-05-13
Supplement: rsos200139supp2.pdf [file rsos200139supp2.pdf]

1 **SUPPLEMENTARY**

2  
3 **Supp. Table 1. Summary of immature green turtle measures and video recorded time.**

| Individual number | Carapace Length (cm) | Carapace Width (cm) | Mass (kg) | Video Recorded Time (h) | Date       |
|-------------------|----------------------|---------------------|-----------|-------------------------|------------|
| #1                | 44                   | 3.2                 | 10        | 1,5                     | 14/02/2018 |
| #2                | 55                   | 43.2                | 37        | 5,9                     | 20/05/2018 |
| #3                | 83                   | 73                  | 68        | 4,0                     | 22/05/2018 |
| #4                | 80                   | 77                  | 64        | 3,8                     | 26/05/2018 |
| #5                | 84                   | 74.8                | 63.8      | 3,9                     | 04/10/2018 |
| #6                | 88,3                 | 74.8                | 83        | 6,6                     | 06/10/2018 |
| #7                | 82                   | 78                  | 67        | 8,0                     | 08/10/2018 |
| #8                | 72.7                 | 67.9                | 59        | 1,0                     | 10/10/2018 |
| #9                | 43.3                 | 38.3                | 9.5       | 4,8                     | 11/02/2019 |
| #10               | 83.5                 | 77.2                | 70        | 2,2                     | 11/02/2019 |
| #11               | 94.2                 | 82                  | 99.8      | 7,8                     | 18/02/2019 |
| #12               | 100.3                | 89.5                | 109       | 2,2                     | 08/04/2019 |
| #13               | 79.5                 | 75.4                | 67.6      | 14,6                    | 13/05/2019 |

4  
5  
6 **Supp. Table 2: Definition and associated category of the behaviour observed from the**  
7 **video-recorder data and associated with a unique acceleration-gyroscope-depth signal.**

| Category          | Behaviour            | Definition                                                            |
|-------------------|----------------------|-----------------------------------------------------------------------|
|                   | <b>Breathing</b>     | Turtle is breathing one time at the surface                           |
| <b>Feeding</b>    | Catching             | Turtle is catching a floating element in water                        |
|                   | Catching jellyfish   | Turtle is catching a jellyfish                                        |
|                   | Chewing on movement  | Turtle is chewing seagrass or algae and keeps swimming                |
|                   | Chewing stationary   | Turtle is chewing seagrass or algae landing at the bottom             |
|                   | Chewing jellyfish    | Turtle is chewing a jellyfish                                         |
|                   | Grabbing on movement | Turtle is grabbing seagrass or algae at the bottom and keeps swimming |
|                   | Grabbing stationary  | Turtle is grabbing seagrass or algae landing at the bottom            |
|                   | Grabbing the wall    | Turtle is grabbing seagrass or algae from a wall or a rock            |
| <b>Gliding</b>    | Gliding ascent       | Turtle is swimming passively without flipper beat toward the surface  |
|                   | Gliding descent      | Turtle is swimming passively without flipper beat toward the bottom   |
| <b>Resting</b>    | Resting              | Turtle is resting at the bottom without moving                        |
|                   | Resting active       | Turtle is resting at the bottom but it is agitated and moves the head |
|                   | Resting in flow      | Turtle is resting in the flow leading to passive body movement        |
|                   | Resting watching     | Turtle is resting at the bottom watching behind                       |
| <b>Scratching</b> | Scratching           | Turtle is scratching its shell                                        |
|                   | Scratching head      | Turtle is scratching its head                                         |

|                 |                                                                                                                                                                                                                                                                                                                                                |                                                                                                                                                                                                                                                                                                                                                                                                                                                                                                                                                                                                                                                                                                                                                              |
|-----------------|------------------------------------------------------------------------------------------------------------------------------------------------------------------------------------------------------------------------------------------------------------------------------------------------------------------------------------------------|--------------------------------------------------------------------------------------------------------------------------------------------------------------------------------------------------------------------------------------------------------------------------------------------------------------------------------------------------------------------------------------------------------------------------------------------------------------------------------------------------------------------------------------------------------------------------------------------------------------------------------------------------------------------------------------------------------------------------------------------------------------|
|                 | Scratching camera                                                                                                                                                                                                                                                                                                                              | Turtle is scratching and the camera touches the rock or other element                                                                                                                                                                                                                                                                                                                                                                                                                                                                                                                                                                                                                                                                                        |
|                 | <b>Staying at the surface</b>                                                                                                                                                                                                                                                                                                                  | Turtle is breathing several time at the surface                                                                                                                                                                                                                                                                                                                                                                                                                                                                                                                                                                                                                                                                                                              |
| <b>Swimming</b> | Stepping back<br>Swimming 1 ascent<br>Swimming 1 descent<br>Swimming 1 horizontally<br>Swimming ascent<br>Swimming descent<br>Swimming horizontally<br>Swimming fast ascent<br>Swimming fast descent<br>Swimming fast horizontally<br>Swimming in place<br>Swimming on the sea floor<br>Prospection<br>Watching<br>Left U-turn<br>Right U-turn | Turtle is moving backward at the bottom<br>Turtle is swimming toward the surface using one front flipper<br>Turtle is swimming toward the bottom using one front flipper<br>Turtle is swimming horizontally using one front flipper<br>Turtle is swimming toward the surface<br>Turtle is swimming toward the bottom<br>Turtle is swimming horizontally<br>Turtle is swimming fast toward the surface<br>Turtle is swimming fast toward the bottom<br>Turtle is swimming fast horizontally<br>Turtle is swimming but stays in place<br>Turtle is moving landing at the bottom<br>Turtle is swimming slowly prospecting on the right and on the left<br>Turtle is swimming watching behind<br>Turtle is turning on the left<br>Turtle is turning on the right |
| <b>Unknown</b>  | Escape<br>Flipper beat<br>Foraging<br>Interaction<br>Landing<br>Obstacle<br>Pursuit<br>Regurgitating<br>Sand<br>Shaking<br>Shaking head<br>Hunting jellyfish                                                                                                                                                                                   | Turtle is escaping to avoid aggression from another turtle.<br>Turtle is scratching its head with its flipper<br>Turtle is touching the bottom to search for something<br>Turtle is touching another turtle with its beak<br>Turtle is abruptly landing at the bottom<br>Turtle is taking an obstacle<br>Turtle is pursuing a second turtle<br>Turtle is regurgitating<br>Turtle is on the ground and sending the sand up with its front flippers<br>Turtle is shaking<br>Turtle is shaking its head<br>Turtle is modifying its trajectory to catch a jellyfish                                                                                                                                                                                              |

10 **Supp. Table 3. Difference between the total times predicted and the actual (video-based) ones for each behavioural category in seconds, in**  
 11 **percent of the total individual observed time and in percent of the behavioural expressed time for each immature green turtles.**

12

| Behaviour       | #1    |     |      | #2    |     |      | #3    |     |      | #4    |     |       | #5    |     |        | #6     |     |      | #7     |     |       |
|-----------------|-------|-----|------|-------|-----|------|-------|-----|------|-------|-----|-------|-------|-----|--------|--------|-----|------|--------|-----|-------|
|                 | s     | %t* | %b** | s     | %t* | %b** | s     | %t* | %b** | s     | %t* | %b**  | s     | %t* | %b**   | s      | %t* | %b** | s      | %t* | %b**  |
| Breathing       | 6,7   | 0,1 | 18,8 | 101,4 | 0,5 | 33,7 | 25,6  | 0,2 | 69,9 | 27,8  | 0,2 | 137,6 | 47,2  | 0,3 | 71,3   | 30,3   | 0,1 | 34,7 | 70,2   | 0,2 | 79,0  |
| Feeding         | 0,9   | 0,0 | -    | 31,7  | 0,2 | 2,1  | 78,6  | 0,6 | 48,6 | 110,5 | 0,8 | 20,5  | 56,1  | 0,4 | 36,9   | 1006,2 | 4,2 | 51,5 | 279,4  | 1,0 | 401,4 |
| Gliding         | 0,2   | 0,0 | -    | 4,4   | 0,0 | 0,5  | 101,4 | 0,7 | 27,7 | 340,8 | 2,5 | 65,1  | 100,0 | 0,7 | 47,4   | 51,6   | 0,2 | 18,2 | 26,1   | 0,1 | 2,5   |
| Other           | 0,0   | 0,0 | -    | 124,2 | 0,6 | 48,2 | 123,8 | 0,9 | 73,3 | 73,6  | 0,5 | 26,0  | 123,7 | 0,9 | 83,8   | 530,9  | 2,2 | 64,9 | 31,2   | 0,1 | 22,9  |
| Resting         | 4,1   | 0,1 | -    | 15,3  | 0,1 | 0,2  | 261,2 | 1,8 | 3,4  | 270,8 | 2,0 | 5,7   | 101,1 | 0,7 | 1,7    | 517,7  | 2,2 | 4,6  | 1640,6 | 5,7 | 8,4   |
| Scratching      | 0,7   | 0,0 | -    | 26,7  | 0,1 | 5,2  | 50,2  | 0,4 | 8,7  | 225,3 | 1,7 | 12,6  | 150,5 | 1,1 | 1880,7 | 33,1   | 0,1 | 3,7  | 223,5  | 0,8 | 164,3 |
| Stay in surface | 0,0   | 0,0 | -    | 271,9 | 1,3 | 30,3 | 42,0  | 0,3 | 3,0  | 172,6 | 1,3 | 11,2  | 465,2 | 3,3 | 33,4   | 133,3  | 0,6 | 5,2  | 237,9  | 0,8 | 8,1   |
| Swimming        | 342,2 | 6,4 | 6,5  | 85,3  | 0,4 | 1,3  | 31,4  | 0,2 | 0,8  | 449,9 | 3,3 | 11,0  | 562,1 | 4,0 | 8,8    | 600,3  | 2,5 | 10,0 | 757,2  | 2,6 | 15,8  |
| Transition      | 4,4   | 0,1 | -    | 68,0  | 0,3 | -    | 24,3  | 0,2 | -    | 28,6  | 0,2 | -     | 44,9  | 0,3 | -      | 124,8  | 0,5 | -    | 55,3   | 0,2 | -     |

13

14

| Behaviour       | #8    |     |      | #9   |     |      | #10   |     |      | #11   |     |       | #12   |     |        | #13   |     |      | Average |     |       |
|-----------------|-------|-----|------|------|-----|------|-------|-----|------|-------|-----|-------|-------|-----|--------|-------|-----|------|---------|-----|-------|
|                 | s     | %t* | %b** | s    | %t* | %b** | s     | %t* | %b** | s     | %t* | %b**  | s     | %t* | %b**   | s     | %t* | %b** | s       | %t* | %b**  |
| Breathing       | 2,15  | 0,1 | 37   | 21,7 | 0,1 | 37,8 | 10,8  | 0,1 | 39,7 | 2,8   | 0   | 2,118 | 23,8  | 0,1 | 31,818 | 47,3  | 0,1 | 16,1 | 32,131  | 0,2 | 46,87 |
| Feeding         | 4,796 | 0,1 | -    | 391  | 2,3 | 37,9 | 261,7 | 3,2 | 39,6 | 72,34 | 0,3 | 1130  | 156,6 | 0,8 | 74,617 | 246,1 | 0,5 | 138  | 207,38  | 1,1 | 180,1 |
| Gliding         | 3,32  | 0,1 | 3,3  | 60,1 | 0,3 | 4,78 | 108,7 | 1,3 | 84,3 | 491,2 | 1,8 | 80,69 | 51,7  | 0,3 | 6,7874 | 2899  | 5,5 | 128  | 326,02  | 1   | 39,06 |
| Other           | 27,93 | 0,8 | 62   | 251  | 1,5 | 96,3 | 107,1 | 1,3 | 41,1 | 151,1 | 0,5 | 64,86 | 192,5 | 1   | 74,449 | 121,9 | 0,2 | 64,9 | 143,02  | 0,8 | 60,2  |
| Resting         | 36,8  | 1,1 | 5,2  | 1169 | 6,8 | 16,3 | 51,89 | 0,6 | 8,62 | 51,44 | 0,2 | 0,293 | 1058  | 5,5 | 8,4318 | 4527  | 8,6 | 16,5 | 746,53  | 2,7 | 6,601 |
| Scratching      | 28,3  | 0,8 | -    | 108  | 0,6 | 169  | 196   | 2,4 | 942  | 51,68 | 0,2 | 29,27 | 187,2 | 1   | 95,889 | 258,2 | 0,5 | 118  | 118,43  | 0,7 | 311,8 |
| Stay in surface | 1,45  | 0   | 0,3  | 54,4 | 0,3 | 5,27 | 65,9  | 0,8 | 8,06 | 140,6 | 0,5 | 9,471 | 98,5  | 0,5 | 7,4934 | 272,8 | 0,5 | 8,4  | 150,5   | 0,8 | 10,84 |
| Swimming        | 27,82 | 0,8 | 1,4  | 678  | 3,9 | 10,7 | 35,74 | 0,4 | 0,65 | 457,3 | 1,6 | 5,91  | 366,7 | 1,9 | 9,6364 | 1342  | 2,5 | 7,1  | 441,28  | 2,4 | 6,884 |
| Transition      | 10,82 | 0,3 | -    | 29,5 | 0,2 | -    | 14,24 | 0,2 | -    | 16,02 | 0,1 | -     | 85,45 | 0,4 | -      | 115   | 0,2 | -    | 47,789  | 0,2 | -     |

15

16 \* in percent of the total individual observed time

17 \*\* in percent of the behavioural observed time

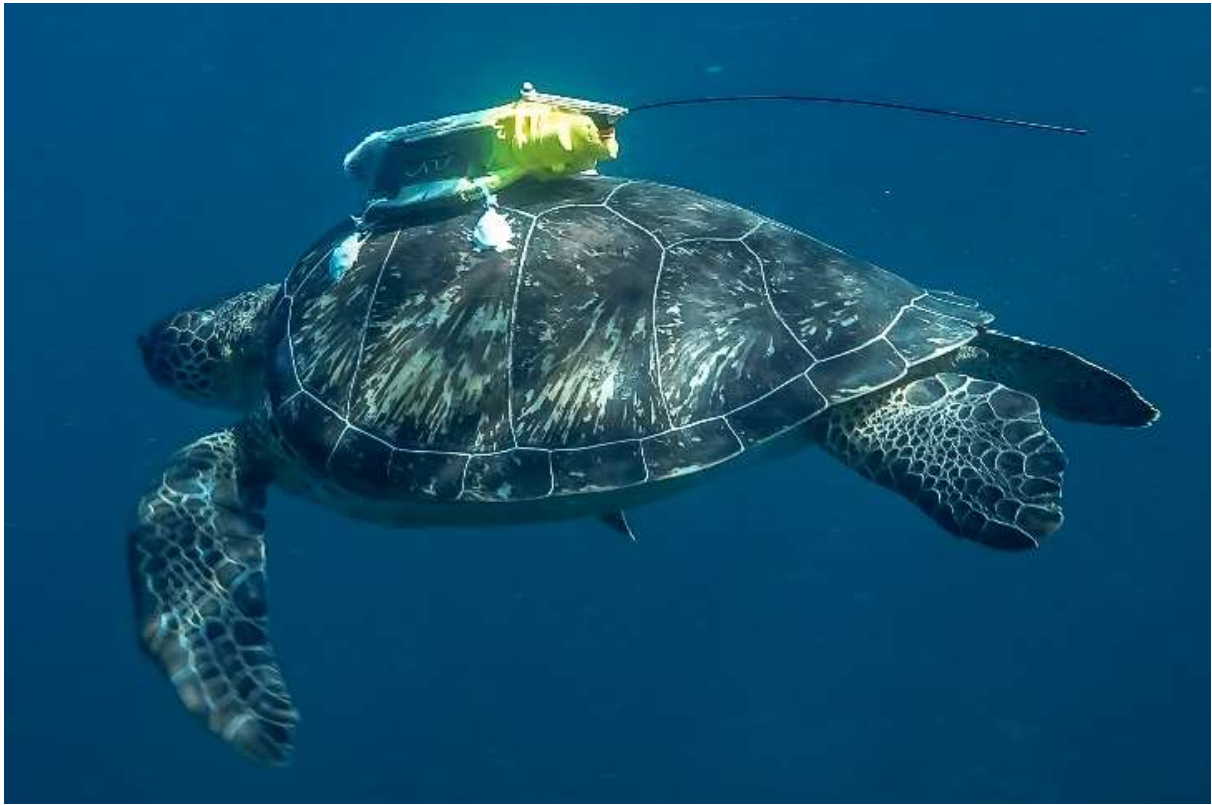

**Supp. Figure 1. Free-ranging immature green turtle equipped with a device combining a high-frequency tri-axial accelerometer, a high-frequency tri-axial gyroscope, a depth recorder and video-recorder.**
